# Supplementary material for: Adaptive detectors in the Krylov subspace
Source: Springer Nature journal article supplement (doi:10.1007/s11432-014-5080-1), 2014-05-17
Supplement: 11432_2014_5080_MOESM1_ESM.pdf [file 11432_2014_5080_MOESM1_ESM.pdf]

中文题目: 基于Krylov子空间的自适应检测器

摘要: 验证了Krylov子空间技术在信号检测和滤波中的有效性. 提出了一种新的多级维纳滤波器(MWF)和辅助向量滤波器(AVF)等价性的证明方法. 把MWF和AVF与两种检测器(自适应匹配滤波检测器(AMF)和广义似然比检测器(GLRT))及对角加载(DL)技术相结合, 形成了新的检测器. 与传统AMF和GLRT检测器相比, 新检测器具有更高的检测概率(PD), 尤其是训练样本数较低时. 更重要的是, 新检测器对杂波子空间秩的选取不敏感. 此外, 新检测器具有渐近恒虚警(CFAR)特性.

关键词: 自适应匹配滤波检测器(AMF) 辅助向量滤波器(AVF) 对角加载(DL) 广义似然比检测器(GLRT) Krylov子空间 多级维纳滤波器(MWF)

创新点:

- 1.提出了一种新的多级维纳滤波器(MWF)和辅助向量滤波器(AVF)等价性的证明方法.
- 2.把MWF和AVF与AMF和GLRT及对角加载(DL)技术相结合, 提出了新的检测器.
- 3.推导了新检测器渐近的检测概率和虚警概率.
